# Supplementary material
Source: Springer Nature journal article supplement (https://www.springermedizin.de/resource/supplementary/12874_2007_231_MOESM2_ESM.pdf/9434042)

Journal

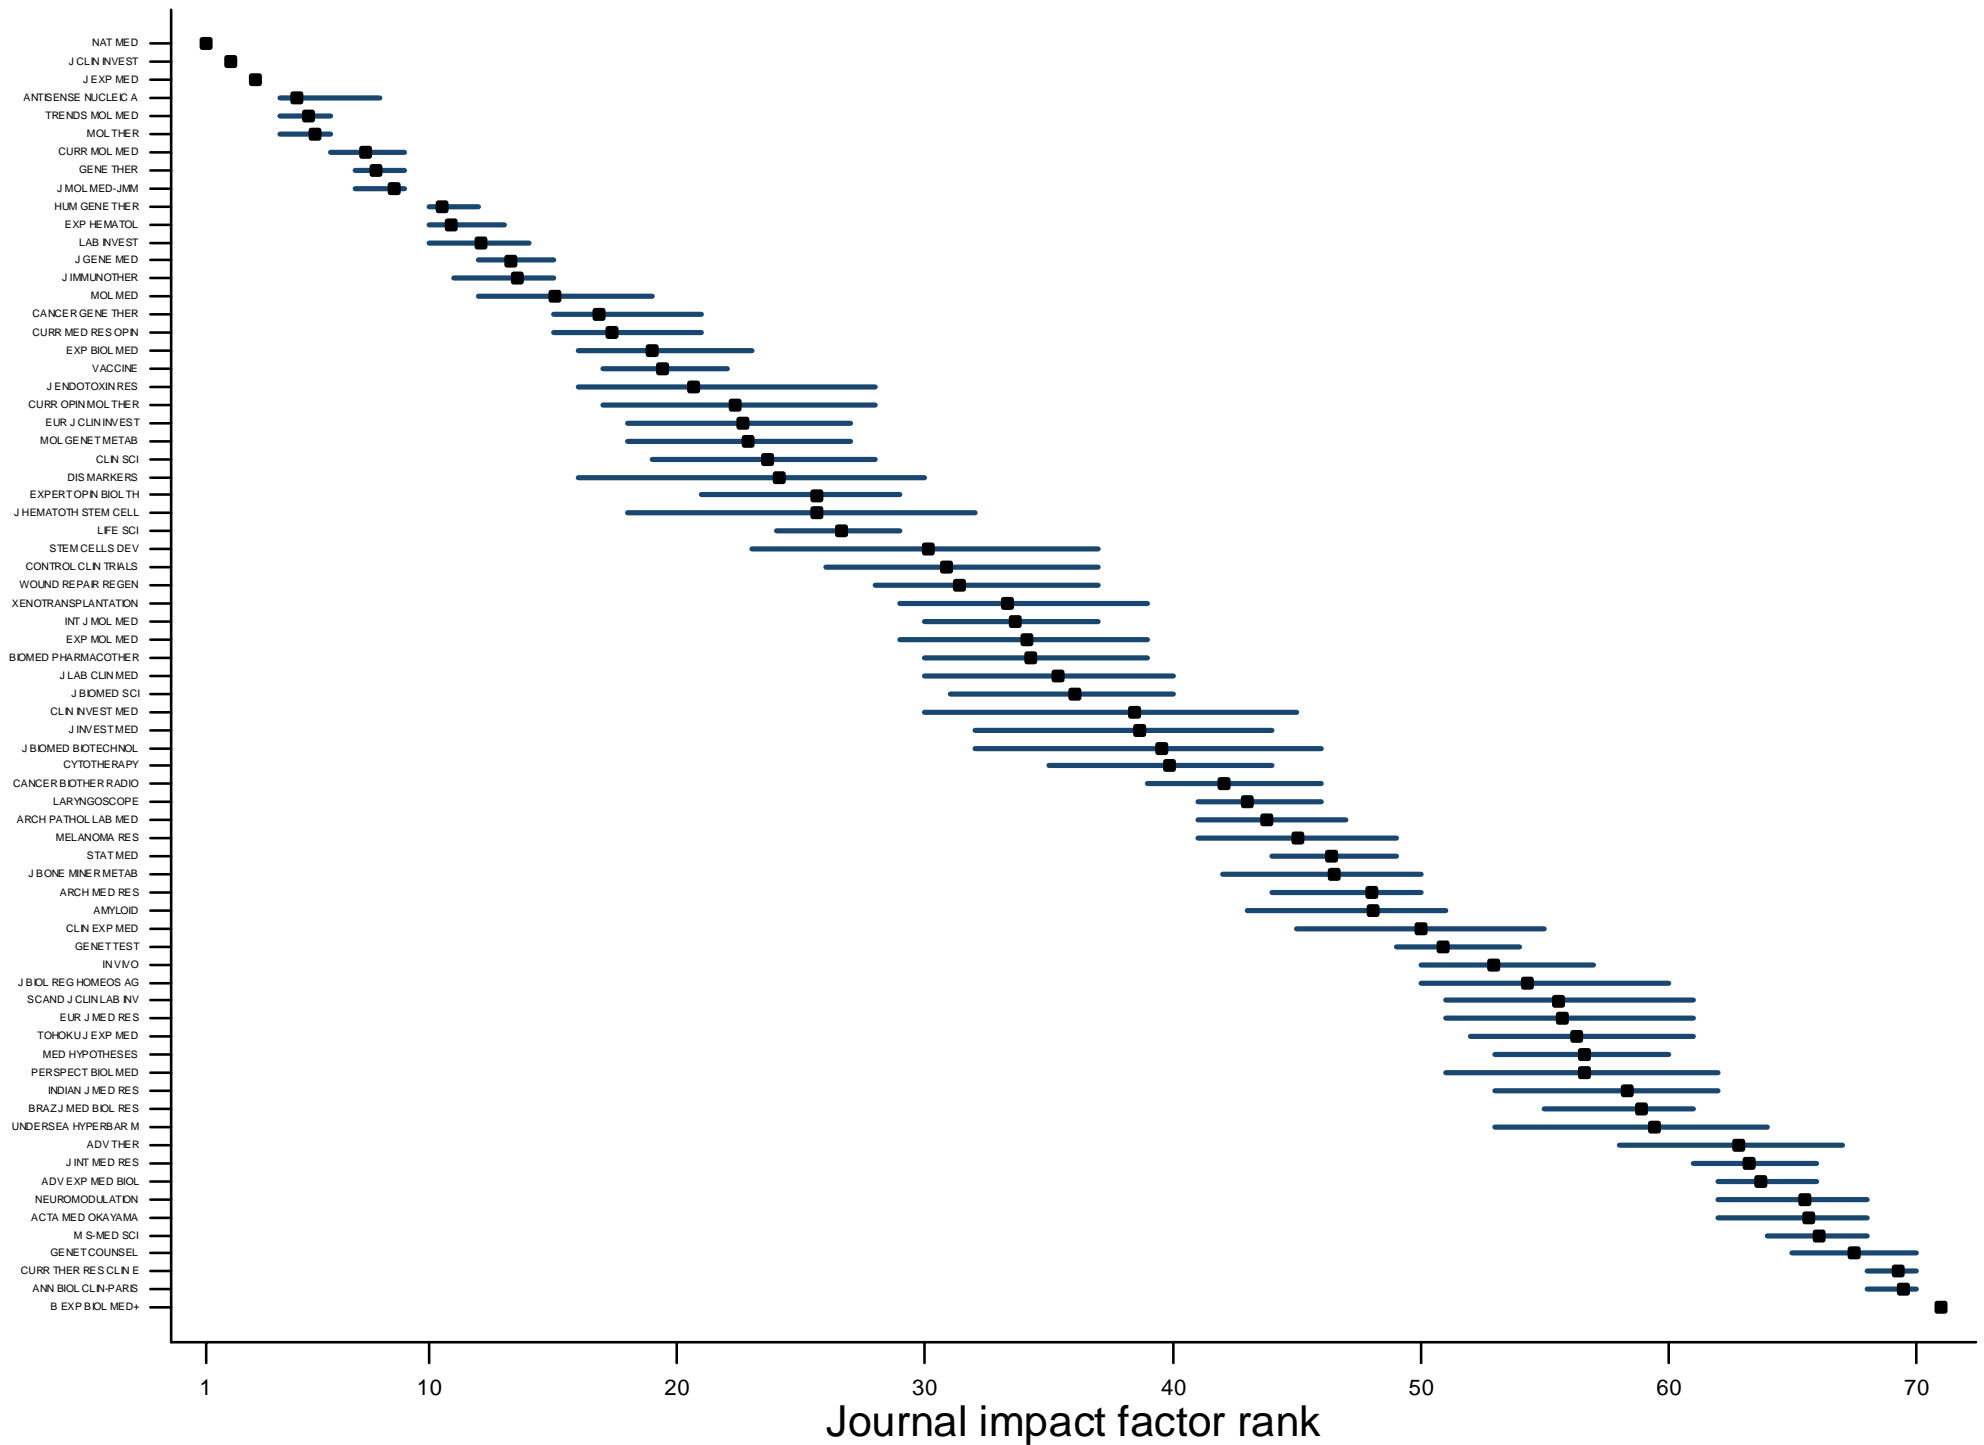

Supplement: MOESM2 [file 9434042]
